# Supplementary material for: The dual PI3K/mTOR inhibitor dactolisib elicits anti-tumor activity in vitro and in vivo
Source: PubMed Central journal article supplement (PMC5787502; doi:10.18632/oncotarget.23091), 2017-12-09
Supplement: oncotarget-09-706-s001.pdf [file oncotarget-09-706-s001.pdf]

# The dual PI3K/mTOR inhibitor dactolisib elicits anti-tumor activity *in vitro* and *in vivo*

## SUPPLEMENTARY MATERIALS

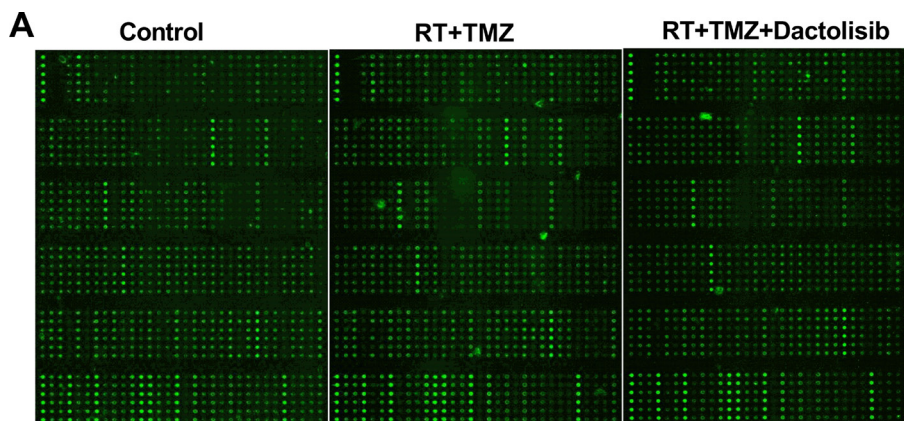

**Supplementary Figure 1: Anti-tumor and pro-apoptotic effects of dactolisib are associated with a reduction of p-AKT and mTOR.** SHG44 cells were treated with TMZ+RT or TMZ+RT+Dactolisib and subjected to microarray analysis. Non-treated SHG44 cells were used as a control. Compared to TMZ+RT, treatment with TMZ+RT+dactolisib induced overexpression of p27 and decreased p-AKT, mTOR, and Bcl-2 protein levels.
